# Supplementary material
Source: publisher figshare collection journal article supplement (https://acs.figshare.com/ndownloader/files/4207114)
Supplement: Supplementary file 1 [file 4207114]

## Supporting information

### **Novel in situ N-Doped (BiO)<sub>2</sub>CO<sub>3</sub> Hierarchical Microspheres Self-Assembled by Nanosheets as Efficient and Durable Visible Light Driven Photocatalyst**

*Fan Dong<sup>†,‡</sup>, Yanjuan Sun<sup>†</sup>, Min Fu<sup>†</sup>, Wing-Kei Ho<sup>£</sup>, S. C. Lee<sup>\*‡</sup>, and Zhongbiao Wu<sup>\*§</sup>*

<sup>†</sup> College of Environmental and Biological Engineering, Chongqing Technology and Business University, Chongqing, 400067, P. R. China.

<sup>‡</sup> Department of Civil and Structural Engineering, Research Center for Environmental Technology and Management, The Hong Kong Polytechnic University, Hong Kong, P. R. China. E-mail: ceslee@polyu.edu.hk (S. C. Lee).

<sup>§</sup> Department of Environmental Engineering, Zhejiang University, Hangzhou 310027, P. R. China. E-mail: zbwu@zju.edu.cn (Zhongbiao Wu).

<sup>£</sup> Hong Kong Nano and Advanced Materials Institute Limited, hosted by The Hong Kong University of Science and Technology, Hong Kong, P. R. China.

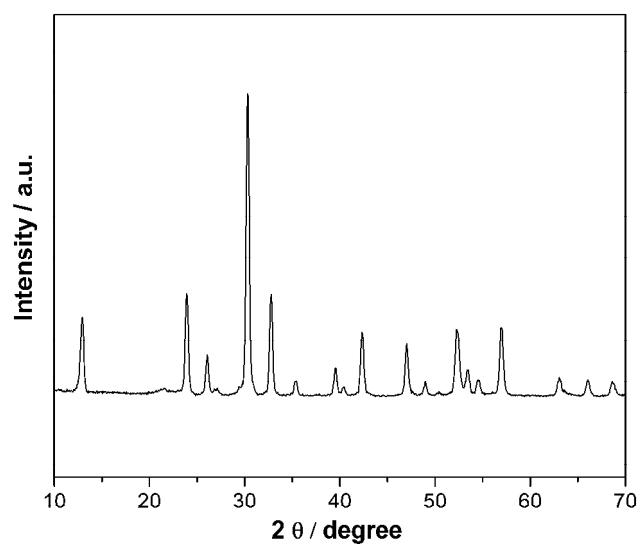

Figure S1 XRD pattern of BOC sample.

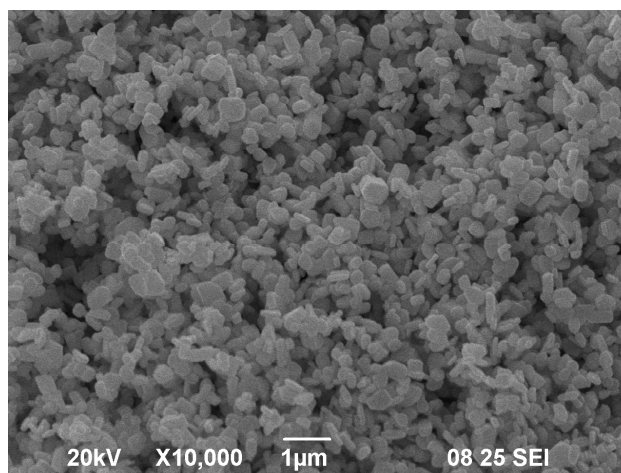

Figure S2 SEM image of BOC sample with particle morphology

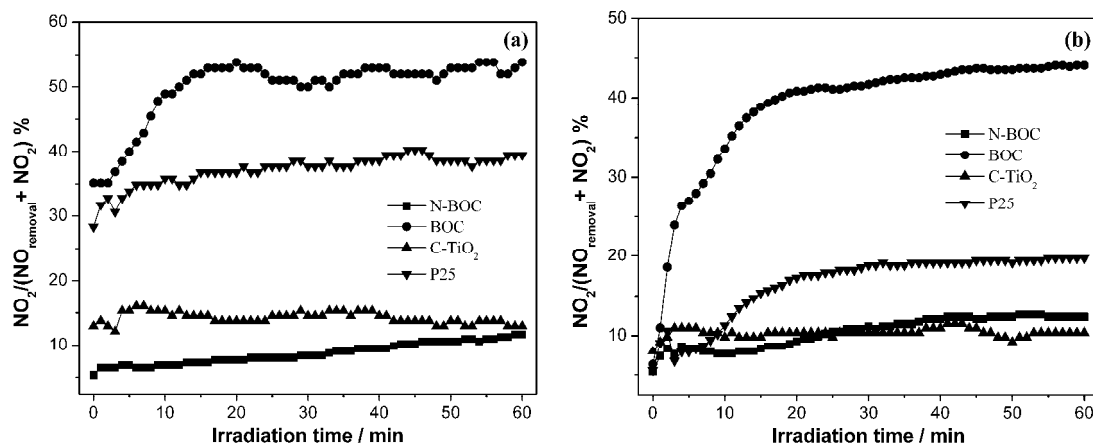

Figure S3 Evolution of  $\text{NO}_2$  during photocatalytic removal of NO in air under (a) visible light and (b) UV-vis light irradiation over N-BOC, BOC, C-doped  $\text{TiO}_2$  and P25.

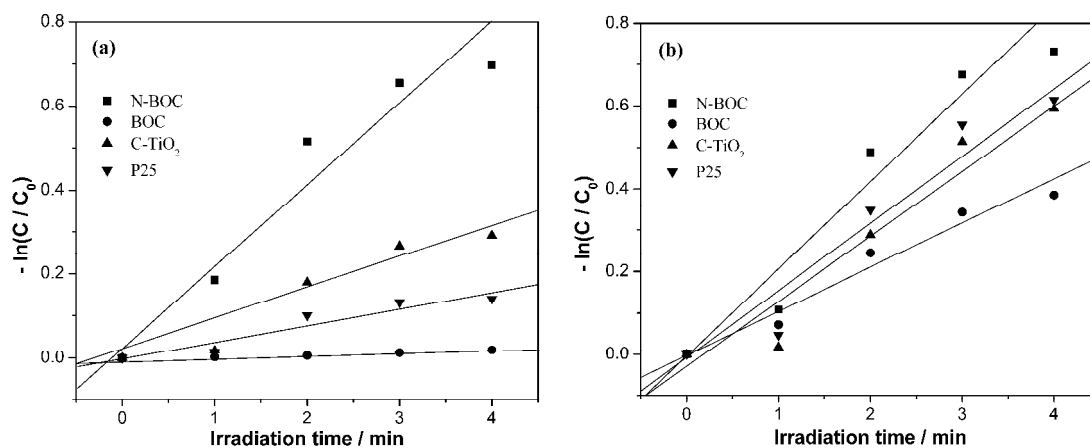

Figure S4 Dependence of  $-\ln(C/C_0)$  versus irradiation time under (a) visible light and (b) UV-vis light irradiation over N-BOC.
